# Supplementary material for: Integrated Metabolome and Transcriptome Analysis of Fruit Flavor and Carotenoids Biosynthesis Differences Between Mature-Green and Tree-Ripe of cv. “Golden Phoenix” Mangoes (Mangifera indica L.)
Source: Front Plant Sci. 2022 Feb 24;13:816492. doi: 10.3389/fpls.2022.816492 (PMC8907839; doi:10.3389/fpls.2022.816492)
Supplement: Supplementary file 3 [file Data_Sheet_3.XLSX]

## Sheet: Sheet1
Table S9. 143 volatile-related metabolites in MG and TR
Index	Formula	Compounds	Class I	MG-1	MG-2	MG-3	TR-1	TR-2	TR-3	VIP	p_value	FDR	Fold_Change	Log2FC	Type
XMW0511	C20H40O	3,7,11,15-Tetramethyl-2-hexadecen-1-ol	Terpenoids	2757.99	1815.56	2126.58	9	9	9	1.13146	0.0151824	0.0301539	0.00402978	-7.95508	down
XMW1027	C15H26O	(1S,4aS,7R,8aS)-1,4a-Dimethyl-7-(prop-1-en-2-yl)decahydronaphthalen-1-ol	Terpenoids	31961.9	23604.6	24630.6	9	9	9	1.13143	0.0095578	0.0296222	0.00033667	-11.5364	down
XMW3273	C15H24	1,3-Dimethyl-5-(propen-1-yl)adamantane	Terpenoids	24450.6	19110.7	22915.6	9	9	9	1.13175	0.00509571	0.0276046	0.000406156	-11.2657	down
KMW0618	C15H24	Naphthalene, 1,2,3,5,6,8a-hexahydro-4,7-dimethyl-1-(1-methylethyl)-, (1S-cis)-	Terpenoids	11323.7	8440.05	8943.35	6075.91	5794.52	4999.91	1.05321	0.0350842	0.0517221	0.587671	-0.76692	insig
KMW0590	C15H24	Naphthalene, 1,2,3,5,6,7,8,8a-octahydro-1,8a-dimethyl-7-(1-methylethenyl)-, [1R-(1.alpha.,7.beta.,8a.alpha.)]-	Terpenoids	23737.2	18430.2	19378.6	9	9	9	1.13148	0.00628968	0.0290137	0.000438696	-11.1545	down
XMW0985	C15H24	2-Isopropenyl-4a,8-dimethyl-1,2,3,4,4a,5,6,8a-octahydronaphthalene	Terpenoids	164493	107483	125545	5243.15	5525.53	6235.57	1.12976	0.0171132	0.0314766	0.0427756	-4.54707	down
KMW0556	C15H24	Naphthalene, decahydro-4a-methyl-1-methylene-7-(1-methylethenyl)-, [4aR-(4a.alpha.,7.alpha.,8a.beta.)]-	Terpenoids	942382	698800	731529	36618.2	37704.3	38150.6	1.13047	0.0101058	0.0296222	0.0474028	-4.39888	down
XMW0556	C15H24	(2S,4aR,8aR)-4a,8-Dimethyl-2-(prop-1-en-2-yl)-1,2,3,4,4a,5,6,8a-octahydronaphthalene	Terpenoids	98340.7	69955.7	72859.7	3666.03	3834.78	4006.68	1.12985	0.0135839	0.0296271	0.047718	-4.38932	down
KMW0565	C15H24	Caryophyllene	Terpenoids	134173	94572.8	108391	6953.73	6670.63	6501.13	1.13035	0.011837	0.0296222	0.0596954	-4.06624	down
KMW0704	C15H20	.alpha.-Calacorene	Terpenoids	4260.98	3124.15	3825.16	3133.26	3441.77	2739.45	0.725597	0.193542	0.235564	0.830887	-0.267275	insig
KMW0526	C13H18O	2-Buten-1-one, 1-(2,6,6-trimethyl-1,3-cyclohexadien-1-yl)-, (E)-	Terpenoids	555585	519699	607302	11868.6	16041.1	14288.4	1.12991	0.00211343	0.0232477	0.0250793	-5.31736	down
NMW0005	C10H18O	3-Cyclohexen-1-ol, 4-methyl-1-(1-methylethyl)-, (R)-	Terpenoids	171665	129805	140365	83695	118740	132177	0.765524	0.136807	0.170117	0.757323	-0.401019	insig
XMW3064	C10H16O	[1S-(1.alpha.,4.beta.,5.alpha.)]-4-methyl-1-(1-methylethyl)-Bicyclo[3.1.0]hexan-3-one	Terpenoids	7109.07	5226.48	7160.42	9	9	9	1.13195	0.00947595	0.0296222	0.0013849	-9.496	down
XMW1137	C10H16O	Ethanone, 1-(1,3-dimethyl-3-cyclohexen-1-yl)-	Terpenoids	4540.31	3402.66	4292.19	2056.95	2592.84	1551.57	1.01467	0.0122633	0.0296222	0.506848	-0.980376	insig
KMW0459	C10H16O	2,6-Octadienal, 3,7-dimethyl-, (E)-	Terpenoids	113743	82562.4	84174.6	36780.6	44075	40540.7	1.09245	0.0302729	0.0455687	0.432816	-1.20817	down
XMW0144	C10H16O	(+)-2-Bornanone	Terpenoids	12439.3	9945.76	10968.4	2701.54	2686.26	3140.98	1.12711	0.00585779	0.0282911	0.255709	-1.96743	down
KMW0259	C10H16	.gamma.-Terpinene	Terpenoids	192810	144620	155282	55487.1	56935.8	56559	1.12048	0.0177802	0.0314766	0.342962	-1.54388	down
KMW0247	C10H16	.beta.-Phellandrene	Terpenoids	793495	589759	691835	141600	87487.6	131896	1.11643	0.00685844	0.0296222	0.17396	-2.52317	down
KMW0199	C10H16	.beta.-Myrcene	Terpenoids	363585	245183	285619	38836.8	32580.9	40798.1	1.12657	0.016905	0.0314766	0.125467	-2.99462	down
XMW0771	C10H16	1,5-Cyclooctadiene, 3,4-dimethyl-	Terpenoids	506524	368293	410202	83153.5	69442.7	87596.2	1.12516	0.012375	0.0296222	0.186917	-2.41953	down
XMW0632	C10H16	Bicyclo[3.1.1]hept-2-ene, 3,6,6-trimethyl-	Terpenoids	118258	89375.4	109618	23503.3	21132.2	25511.6	1.12706	0.0094341	0.0296222	0.221109	-2.17717	down
WMW0023	C10H16	(+)-alpha-Pinene	Terpenoids	73557.6	67980.8	70946.7	47475.1	43021.2	49643.7	1.10998	0.000798148	0.0193518	0.659529	-0.600492	insig
XMW3308	C10H16	3-methyl-6-(1-methylethylidene)-Cyclohexene	Terpenoids	218899	174649	205317	5813.68	9418.39	9709.82	1.12538	0.00435389	0.0276046	0.0416486	-4.58559	down
XMW0192	C10H16	(+)-4-Carene	Terpenoids	1.1929e+07	9.56684e+06	1.02807e+07	1.15984e+06	1.02644e+06	1.19014e+06	1.13084	0.00522703	0.0276046	0.106255	-3.2344	down
KMW0220	C10H16	3-Carene	Terpenoids	6.11128e+06	4.15604e+06	4.96523e+06	423258	369993	495986	1.12822	0.0142762	0.0296271	0.084637	-3.56257	down
XMW0719	C10H14	p-Mentha-1,5,8-triene	Terpenoids	149087	117403	129883	32791.3	34009.4	32186	1.12801	0.00836074	0.0296222	0.249731	-2.00155	down
NMW0010	C10H12	Dicyclopentadiene	Terpenoids	37943.8	24997	29805.5	8706.28	12727.1	9039.82	1.08423	0.0222425	0.035738	0.328565	-1.60575	down
XMW3650	H4N2O2S	SuTRamide	SuTRur compounds	8508.97	11867.9	12675.2	8696.58	10473.6	7011.35	0.621329	0.234357	0.272464	0.792131	-0.336188	insig
XMW1108	C15H24O	Phenol, 2,4,6-tris(1-methylethyl)-	Phenol	24943.3	21064.6	21334.4	6700.97	8351.39	6127.39	1.11141	0.00154616	0.0201001	0.314509	-1.66883	down
XMW2711	C13H20O	2-(1,1-Dimethylethyl)-6-(1-methylethyl)phenol	Phenol	414252	392739	415439	933531	1.21797e+06	932175	1.11166	0.022125	0.035738	2.52258	1.3349	up
NMW0153	C10H14O	Phenol, 4-butyl-	Phenol	1735.33	1196.82	2117.6	754.383	937.945	824.243	1.01415	0.0818344	0.110399	0.498354	-1.00476	down
XMW0931	C10H12O	8,9-Dehydrothymol	Phenol	19751	15228	21904	9	9	9	1.13191	0.0106038	0.0296222	0.000474659	-11.0408	down
KMW0175	C6H6O	Phenol	Phenol	304859	250404	297782	296229	260966	292051	0.0615754	0.953915	0.960633	0.995545	-0.00644141	insig
XMW1563	C14H31BO	diethyl(decyloxy)-Borane	Others	14114.3	12037.1	14171.4	9691.04	9030.29	8524.64	1.08294	0.0125853	0.0296222	0.675695	-0.565556	insig
XMW0034	C8H14N2	2-Dimethylamino-4-methyl-pent-4-enenitrile	Others	60654.9	58430	57414.4	50460.8	34939.3	51188.9	0.841561	0.124511	0.156185	0.773878	-0.369821	insig
XMW2507	C5H9NO	2-isocyanato-2-methyl-Propane	Nitrogen compounds	7689.53	6158.55	6787.04	4158.07	7137.48	4285.66	0.716445	0.219573	0.259495	0.755082	-0.405295	insig
XMW1421	C13H16O3	3,4-Hexanedione, 1-(phenylmethoxy)-	Ketone	23589.8	18592.3	23239.4	15973.9	19941.6	12688.6	0.810098	0.10591	0.138945	0.74294	-0.428683	insig
WMW0089	C13H22O	5,9-Undecadien-2-one, 6,10-dimethyl-	Ketone	80981.6	65658.8	61191.4	76803.9	112383	84783	0.786786	0.168012	0.207119	1.31823	0.398602	insig
XMW3111	C12H18O2	4-acetyl-2,3,4,5,5-pentamethyl-2-Cyclopenten-1-one	Ketone	8693.86	7881.05	7462.67	17836.3	27224	16967	1.07727	0.0595067	0.0826161	2.58043	1.36761	up
XMW0508	C10H12O3	2,5-Dihydroxy-4-isopropyl-2,4,6-cycloheptatrien-1-one	Ketone	1.55891e+07	1.40092e+07	1.51415e+07	1.02807e+07	1.21458e+07	1.00293e+07	1.04325	0.0097852	0.0296222	0.725435	-0.463082	insig
XMW0250	C12H16O	1-Pentanone, 1-(4-methylphenyl)-	Ketone	225791	156710	159335	28625	35153.3	27201.4	1.11779	0.0208529	0.0352901	0.16791	-2.57424	down
w19	C8H14O2	2H-Pyran-2-one, tetrahydro-6-propyl-	Ketone	9	9	9	10857	11391	17063.7	1.12984	0.0222344	0.035738	1455.99	10.5078	up
XMW0019	C8H8O2	Acetophenone, 4'-hydroxy-	Ketone	145299	118614	137606	3525.18	3702.45	3011.08	1.13067	0.00365736	0.0249049	0.0254999	-5.29336	down
XMW1198	C6H10O2	3-Penten-2-one, 4-methoxy-	Ketone	175099	165591	158442	167108	168753	179028	0.446191	0.440496	0.492117	1.03157	0.0448399	insig
XMW3107	C3O2	1,2-Propadiene-1,3-dione	Ketone	32844.8	30545.6	32401.8	28069.7	35019.4	28138.4	0.368943	0.583389	0.61796	0.952347	-0.0704407	insig
XMW3578	C18H36O	hexadecyl-Oxirane	Hydrocarbons	54326.4	39033.9	49307.7	35362.5	39407	31958.3	0.893441	0.0996749	0.131977	0.748085	-0.418726	insig
XMW3343	C17H36	5,5-Dibutylnonane	Hydrocarbons	5018.63	5626.96	5938	6872	6677.37	4514.37	0.281661	0.589913	0.620276	1.08925	0.12334	insig
KMW0642	C16H34	Hexadecane	Hydrocarbons	69970.5	113392	79870.1	120329	48885.3	22876.7	0.504934	0.515739	0.562982	0.729738	-0.45455	insig
XMW0383	C15H24	1,4,7,-Cycloundecatriene, 1,5,9,9-tetramethyl-, Z,Z,Z-	Hydrocarbons	215319	163668	178014	12521.8	15934.9	16862.2	1.12759	0.00769779	0.0296222	0.0813623	-3.6195	down
KMW0551	C14H30	Tetradecane	Hydrocarbons	92960.4	85181.7	83350.8	94761.5	89008.7	41376.9	0.405601	0.54993	0.586866	0.861007	-0.215904	insig
XMW1608	C14H22	1,5,9,9-Tetramethyl-2-methylene-spiro[3.5]non-5-ene	Hydrocarbons	1.40096e+06	1.31055e+06	1.41349e+06	996544	1.1963e+06	988167	1.00757	0.0273683	0.0420825	0.771153	-0.374912	insig
XMW3393	C13H28	3,3,5-trimethyl-Decane	Hydrocarbons	15972	15514	15976	13461	13844	13518	1.11776	0.00046542	0.0193518	0.86012	-0.217391	insig
XMW0420	C13H28	Undecane, 2,9-dimethyl-	Hydrocarbons	95601.2	84409.7	86713.3	96649.6	89626.1	43270.6	0.413657	0.538655	0.579155	0.860613	-0.216563	insig
XMW3356	C10H14	cis-3,4-diethenyl-Cyclohexene	Hydrocarbons	46756.2	39121.3	47947.5	6650.28	7650	7918.8	1.12922	0.0048039	0.0276046	0.166031	-2.59048	down
XMW1312	C20H28CoN2	Cobalt, bis(.eta.-5-piperidinylcyclopentadienyl)-	Heterocyclic compound	3702.36	5429.95	10076.5	37659.9	168956	5765.77	0.744028	0.326193	0.376174	11.0565	3.46682	insig
XMW0055	C17H24O3	7,9-Di-tert-butyl-1-oxaspiro(4,5)deca-6,9-diene-2,8-dione	Heterocyclic compound	4523.88	2702.91	3363.35	1240.56	1639.53	1042.14	1.05339	0.0417786	0.0591519	0.370367	-1.43297	down
XMW3529	C12H18N2O	2-cyclohexyl-1-(1-methyl-1H-imidazol-4-yl)-Ethanone	Heterocyclic compound	844183	768164	828838	595129	736683	601907	0.954744	0.0475833	0.06671	0.792123	-0.336204	insig
XMW0174	C12H14O2	2,2'-Ethylidenebis(5-methyTRuran)	Heterocyclic compound	38551.1	34222.3	34591.4	25236.9	29739.8	28448.1	1.01795	0.0143879	0.0296271	0.777023	-0.363971	insig
XMW2143	C10H11NO2	7-ethyl-2-methyl-4-benzoxazolol	Heterocyclic compound	13913	13397	13962	8288	8026.33	9179	1.11901	0.000899465	0.0193518	0.617691	-0.695043	insig
KMW0297	C10H18O2	trans-Linalool oxide (furanoid)	Heterocyclic compound	189787	192969	247348	3927.12	5901.98	4237.68	1.12746	0.00812042	0.0296222	0.0223246	-5.48522	down
XMW0546	C11H21N	(5R,8aR)-5-Propyloctahydroindolizine	Heterocyclic compound	5407.13	1219.75	1287.16	429273	571768	338010	1.10889	0.0226634	0.0360097	169.2	7.40258	up
XMW1587	C9H18BNO	diethylboryl-.delta.-Valerolactam	Heterocyclic compound	218333	181439	205091	4876.5	6094.47	5662.15	1.13069	0.00298876	0.0243501	0.0274989	-5.18448	down
XMW3703	C9H18N2	2-Propanamine, 2-methyl-N2-[1-tetrahydro-1H-1-pyrrolylmethylidene]	Heterocyclic compound	44566.2	39858.9	40569	16493.5	16760.5	18742.8	1.12593	0.000795181	0.0193518	0.415994	-1.26536	down
XMW2907	C8H11NO2	3,4-diethyl-1H-Pyrrole-2,5-dione	Heterocyclic compound	68527.9	61912.7	67217.9	62688.9	78621.8	63552.1	0.219158	0.69882	0.71893	1.03645	0.0516481	insig
XMW0358	C9H12O2	1-Pentanone, 1-(2-furanyl)-	Heterocyclic compound	3339.01	2923.1	3604.17	9	9	9	1.13179	0.00363229	0.0249049	0.00273659	-8.5134	down
XMW2782	C5H5N5O	6-Methoxytetrazolo(b)pyridazine	Heterocyclic compound	192625	147962	180656	113513	105135	116529	1.06964	0.0364606	0.0526654	0.643033	-0.637036	insig
XMW0929	C10H10O	Benzofuran, 4,7-dimethyl-	Heterocyclic compound	34250.8	23763.4	26355.2	10014.4	12256.8	10633.2	1.09729	0.0278012	0.0422933	0.390004	-1.35844	down
XMW3797	C8H10O2	2,2',5,5'-tetrahydro-2,2'-Bifuran	Heterocyclic compound	356001	279759	309175	125427	100081	136149	1.10811	0.00490021	0.0276046	0.382731	-1.3856	down
KMW0165	C6H8OS	2,5-DimethyTRuran-3-thiol	Heterocyclic compound	685348	592378	702945	683480	943633	665880	0.543627	0.369771	0.418687	1.15768	0.211242	insig
XMW2395	C5H6N2O	6-methyl-3(2H)-Pyridazinone	Heterocyclic compound	1618070	1454340	1603309	1428275	1905392	1357942	0.0295073	0.978792	0.978792	1.0034	0.00489455	insig
XMW2863	C4H3N3	1H-Pyrazole-4-carbonitrile	Heterocyclic compound	42706	28366.7	32494.5	4663.47	6986.3	5700.8	1.11387	0.0192309	0.0335368	0.16753	-2.57751	down
XMW1424	C2H3N3	1H-1,2,3-Triazole	Heterocyclic compound	6602.15	7921.68	7859.37	6635.24	10764.2	6411.24	0.138355	0.773914	0.784892	1.06377	0.0891907	insig
XMW2691	C9H19Br	2-Bromononane	Halogenated hydrocarbons	7805.71	6582.43	7174.47	6634.95	6938.28	6131.77	0.680152	0.228365	0.267674	0.91385	-0.129971	insig
XMW3550	C7H5FO3	3-fluoro-4,5-dihydroxy-Benzaldehyde	Halogenated hydrocarbons	39571.5	28054.8	37286	31984.9	67444.2	20383.5	0.0379138	0.762725	0.779069	1.14202	0.191594	insig
WMW0174	C6H4Cl2	Benzene, 1,2-dichloro-	Halogenated hydrocarbons	9964.79	7229.25	6099.86	13444.1	10766.6	9239.1	0.809797	0.114668	0.146533	1.43599	0.522043	insig
XMW0458	C5H7ClN2	Pyridinium, 1-amino-, chloride	Halogenated hydrocarbons	302515	237720	280737	218011	268190	215150	0.707631	0.196029	0.235564	0.854293	-0.227196	insig
XMW2417	F2HO2P	Difluorophosphoric acid	Halogenated hydrocarbons	6781	6859.12	6612.87	20488.4	23079.6	27183.4	1.12105	0.0130503	0.0296222	3.49338	1.80462	up
XMW2122	C29H23NO	4-fluoro-3-nitro-benzoic acid, 2,4-bis(1,1-dimethylpropyl)phenyl ester	Ester	11955.2	10782.6	11920.9	13700	20639.2	10536.2	0.559841	0.371841	0.418687	1.29478	0.372707	insig
XMW1972	C17H19F6NO3	N-(2,5-ditrifluoromethylbenzoyl)-D-Alanine, pentyl ester	Ester	9	9	9	74063.2	91542.7	62349	1.13133	0.0122356	0.0296222	8442.77	13.0435	up
XMW2697	C19H38O2	Hexadecanoic acid, propyl ester	Ester	9	9	9	2761.5	3803.91	2465.79	1.13094	0.0177965	0.0314766	334.489	8.38582	up
WMW0114	C16H30O4	Propanoic acid, 2-methyl-, 1-(1,1-dimethylethyl)-2-methyl-1,3-propanediyl ester	Ester	6917.08	5113.02	5912.21	12254.4	12706.1	13309.5	1.09293	0.00108262	0.0193518	2.13294	1.09285	up
KMW0709	C18H36O2	Hexadecanoic acid, ethyl ester	Ester	23761.2	5452.76	3377.93	631082	785259	527396	1.09091	0.0130483	0.0296222	59.6387	5.89818	up
XMW1420	C17H34O2	Pentadecanoic acid, 14-methyl-, methyl ester	Ester	3931.3	3351.33	3100.14	20450.8	22143.4	16960.1	1.12418	0.00735022	0.0296222	5.73589	2.52002	up
XMW2447	C17H34O2	Tetradecanoic acid, propyl ester	Ester	9	9	9	6032.21	7668.66	4807.06	1.13102	0.0176282	0.0314766	685.479	9.42097	up
XMW1486	C17H28O2	5-Azulenemethanol, 1,2,3,4,5,6,7,8-octahydro-.alpha.,.alpha.,3,8-tetramethyl-, acetate, [3S-(3.alpha.,5.alpha.,8.alpha.)]-	Ester	67827.5	44352.7	55093.5	4166.95	4867.78	4412.39	1.1279	0.0169897	0.0314766	0.0803899	-3.63684	down
XMW0852	C11H10F3NO3	l-Alanine, N-(2,3,4-trifluorobenzoyl)-, methyl ester	Ester	9816.02	8131.41	9277.84	7785.12	7818.73	7276.4	0.941633	0.0870572	0.116348	0.840405	-0.250843	insig
KMW0665	C16H32O2	n-Butyl laurate	Ester	9	9	9	2349.84	2394.18	1442.52	1.12995	0.0220587	0.035738	229.131	7.84003	up
KMW0676	C16H32O2	Tetradecanoic acid, ethyl ester	Ester	21105.2	5956.07	3517.04	1.40912e+06	1.55827e+06	1.04656e+06	1.10619	0.0127564	0.0296222	131.268	7.03637	up
XMW0667	C16H30O2	Ethyl 9-tetradecenoate	Ester	9	9	9	6305.49	8776.69	6078.91	1.13118	0.0147099	0.0296271	783.744	9.61424	up
XMW2171	C16H26O2	Myrtenyl 3-methylvalerate	Ester	13357.6	10041.7	12609.2	3181.01	3585.08	2708.01	1.11655	0.00923658	0.0296222	0.263107	-1.92628	down
XMW2947	C15H30O2	Dodecanoic acid, propyl ester	Ester	9	9	9	7908	8993	6215	1.13119	0.0108513	0.0296222	856.148	9.74172	up
KMW0654	C15H30O2	Methyl tetradecanoate	Ester	1120.09	1225.7	1069.2	19267.4	20034.3	15121.6	1.13058	0.0079138	0.0296222	15.9366	3.99427	up
XMW1359	C15H30O2	Ethyl tridecanoate	Ester	9	9	9	15706	17347	14496	1.13136	0.00270891	0.0243501	1761.07	10.7822	up
KMW0594	C14H28O2	Dodecanoic acid, ethyl ester	Ester	9206.49	2883.87	1675.18	1.33888e+06	1.46757e+06	1.01591e+06	1.11395	0.0109952	0.0296222	277.676	8.11726	up
XMW1435	C14H22O2	(6,6-dimethyl-2-bicyclo[3.1.1]hept-2-enyl)methyl 2-methylpropanoate	Ester	9	9	9	2137.46	3102.97	2163.39	1.13094	0.0162767	0.0314536	274.215	8.09917	up
XMW0617	C12H24O3	Propanoic acid, 2-methyl-, 3-hydroxy-2,2,4-trimethylpentyl ester	Ester	13650.3	10669.9	11116	18591.2	16694.2	17073.4	1.03334	0.010694	0.0296222	1.47755	0.56321	insig
NMW0258	C12H17NO2	Fenobucarb	Ester	9	9	9	3399.34	4604.36	2690.58	1.13066	0.0238032	0.0374051	396.085	8.62967	up
XMW2369	C10H20O4	2-(2-butoxyethoxy)-Ethanol,acetate	Ester	2.61486e+06	2.36636e+06	2.60175e+06	2.23059e+06	2.829e+06	2.24136e+06	0.277232	0.693194	0.71831	0.96281	-0.0546777	insig
XMW0695	C12H24O2	Propanoic acid, 2-methyl-, octyl ester	Ester	9	9	9	5633	5536.84	5121.33	1.13126	0.000837628	0.0193518	603.377	9.23692	up
KMW0542	C12H24O2	Decanoic acid, ethyl ester	Ester	2434.86	1698.48	1723.77	271063	286277	195566	1.12836	0.0124448	0.0296222	128.546	7.00614	up
D443	C11H16O3	2-Furancarboxylic acid, hexyl ester	Ester	4.25347e+06	3.80931e+06	4.15749e+06	2.29672e+06	2.97166e+06	2.1638e+06	1.04571	0.0104558	0.0296222	0.608185	-0.717418	insig
D393	C12H18O2	1,3-Cyclohexadiene-1-carboxylic acid, 2,6,6-trimethyl-, ethyl ester	Ester	12370.7	10490.8	11861.9	6436.96	6057.42	5444.41	1.11153	0.00306505	0.0243501	0.516619	-0.952828	insig
D154	C12H16O2	.beta.-Phenylethyl butyrate	Ester	2.3675e+06	2.16949e+06	2.36834e+06	35594.7	50215.2	40295.7	1.12948	0.000818347	0.0193518	0.0182621	-5.77501	down
XMW0768	C8H17O3P	Cyclohexyl methyl methylphosphonate	Ester	2870.01	2355.55	2732.41	4712.66	7459.32	4005.33	0.982933	0.118579	0.15006	2.03284	1.0235	insig
XMW1240	C11H22O2	Hexanoic acid, 2-methylbutyl ester	Ester	17808	7738.42	6269.17	10047.7	15662.9	14892.8	0.481456	0.521684	0.565158	1.27621	0.351868	insig
XMW2839	C11H18O2	(.+-.)-1,2,3-trimethyl-2-Cyclopentene-1-carboxylic acid, ethyl ester	Ester	162753	148123	142483	98325.9	129708	97876.8	0.962613	0.0359499	0.0524575	0.71888	-0.476176	insig
D436	C10H12O3	Methyl p-tolyloxyacetate	Ester	33555.6	30515.7	32683.3	27312	28603.1	27521.9	1.0498	0.0246306	0.0382845	0.862357	-0.213643	insig
KMW0500	C11H14O2	Butanoic acid, phenylmethyl ester	Ester	2233.76	1969.12	1803.94	46672.4	73033.5	51472.3	1.12806	0.0209767	0.0352901	28.4973	4.83275	up
KMW0390	C10H20O2	Octanoic acid, ethyl ester	Ester	9	9	9	60488.9	62320	46292.6	1.13127	0.0079802	0.0296222	6263.02	12.6126	up
KMW0372	C10H20O2	Butanoic acid, hexyl ester	Ester	9	9	9	27818.5	27807.6	23551	1.13129	0.00288711	0.0243501	2932.48	11.5179	up
XMW0299	C8H16O2	Butanoic acid, butyl ester	Ester	9	9	9	28893	29161	25857	1.1313	0.00143268	0.0201001	3107.81	11.6017	up
XMW1292	C8H16O2	Butanoic acid, 2-methylpropyl ester	Ester	9	9	9	7906.48	7821.32	6722.35	1.13127	0.00259247	0.0243501	831.487	9.69955	up
KMW0191	C8H16O2	Hexanoic acid, ethyl ester	Ester	9	9	9	6746	7007	4945.23	1.13107	0.0106722	0.0296222	692.527	9.43573	up
KMW0492	C6H10O2	2(3H)-Furanone, 5-ethyldihydro-	Ester	9	9	9	288254	453055	375370	1.13117	0.0159633	0.0312707	41358.5	15.3359	up
XMW0439	C3H5NO	Ethane, isocyanato-	Ester	2115.49	2753.91	1431.92	5999.9	6432.98	7039.08	1.0825	0.00106006	0.0193518	3.09014	1.62767	up
XMW0308	C15H24O	4-Nonylphenol	Aromatics	893.181	759.123	905.304	1414.29	1488.68	1700.03	1.08319	0.00540509	0.0276046	1.79973	0.847782	insig
XMW2629	C15H14O	9,9-dimethyl-Xanthene	Aromatics	1.34454e+06	1.20339e+06	1.31899e+06	887729	1.06938e+06	872743	1.02603	0.0141553	0.0296271	0.731809	-0.450461	insig
XMW1155	C15H14	9H-Fluorene, 1,9-dimethyl-	Aromatics	4.78871e+06	4.39744e+06	4.73092e+06	3.30935e+06	4.07306e+06	3.40058e+06	0.993044	0.0312165	0.0464996	0.774804	-0.368098	insig
XMW0540	C11H16O	Benzene, 1-methoxy-4-methyl-2-(1-methylethyl)-	Aromatics	6343.28	4827.71	6697.28	9	9	9	1.13195	0.00916767	0.0296222	0.00151106	-9.37023	down
XMW2503	C10H14O	1-ethoxy-4-ethyl-Benzene	Aromatics	30796	25726.6	28996.9	7054.83	9446.85	7604.31	1.11766	0.00133101	0.0201001	0.281877	-1.82686	down
XMW0126	C10H14	Benzene, 1-methyl-3-(1-methylethyl)-	Aromatics	1.03391e+06	834368	848905	214392	182051	226474	1.12552	0.00652211	0.0291457	0.229251	-2.125	down
XMW0525	C10H12	Benzene, 1-ethenyl-3,5-dimethyl-	Aromatics	3.71288e+06	2.59287e+06	2.9258e+06	624918	615178	637585	1.12529	0.0178294	0.0314766	0.203398	-2.29762	down
XMW0711	C7H7NO	Formamide, N-phenyl-	Aromatics	41069.4	28366.7	32494.5	4663.47	7011.11	5525.09	1.115	0.0147099	0.0296271	0.168739	-2.56713	down
KMW0060	C7H8	Toluene	Aromatics	13882.7	12026.3	12724.2	36994.7	26690.3	42080.2	1.07995	0.0369357	0.052818	2.73767	1.45295	up
XMW3632	C12H25NO2	N-(2-hydroxyethyl)-Decanamide	Amine	908656	688729	827540	569688	707243	531197	0.888781	0.0716837	0.0976263	0.745643	-0.423443	insig
KMW0399	C10H20O	Decanal	Aldehyde	4990.76	3743.98	4334.25	4252.84	5974.44	4396.54	0.407837	0.481939	0.534243	1.11897	0.162173	insig
XMW0681	C10H16O	6-Octenal, 7-methyl-3-methylene-	Aldehyde	29446.9	23330.7	30053.9	6426.15	9175.25	6405.98	1.10728	0.0047099	0.0276046	0.265688	-1.91219	down
KMW0473	C10H14O	4-Isopropylcyclohexa-1,3-dienecarbAldehyde	Aldehyde	136594	96212.3	141012	5314.74	6521.67	4317.67	1.12639	0.0138564	0.0296271	0.0432137	-4.53237	down
KMW0282	C9H18O	Nonanal	Aldehyde	19809.4	19669.3	17882.4	40839.3	50680.5	41704.5	1.11757	0.0126076	0.0296222	2.32255	1.21571	up
XMW0170	C9H10O	BenzAldehyde, 3-ethyl-	Aldehyde	4638.67	4369.05	4218.29	19545	27880.5	20382.1	1.1223	0.0203762	0.0351059	5.12684	2.35807	up
KMW0066	C6H12O	Hexanal	Aldehyde	311081	402957	347941	120850	566973	102702	0.526747	0.613594	0.640467	0.744388	-0.425872	insig
KMW0095	C6H10O	2-Hexenal	Aldehyde	329617	436304	413650	313707	453448	259231	0.420941	0.495032	0.544535	0.870134	-0.20069	insig
XMW1430	C5H4O2	3-FurAldehyde	Aldehyde	193246	191210	187112	166069	127268	169804	0.872598	0.114767	0.146533	0.8103	-0.303472	insig
XMW3653	C15H22O	(S,Z)-2-Methyl-6-(p-tolyl)hept-2-en-1-ol	Alcohol	1874.82	1613.27	1829.63	6906.05	7743.64	5578.48	1.1166	0.0145399	0.0296271	3.80392	1.92749	up
XMW0930	C11H13F3O	3,4,5-Trifluorobenzyl Alcohol, 2-methylpropyl ether	Alcohol	14272.8	11336.8	13983.7	2486.31	3091.33	1915.82	1.11254	0.00359593	0.0249049	0.18926	-2.40156	down
XMW0728	C12H16O	Benzenemethanol, 4-methyl-.alpha.-(1-methyl-2-propenyl)-, (R*,R*)-	Alcohol	34707.4	30350.6	33121.5	20473.8	25029.9	20632.1	1.05694	0.0059352	0.0282911	0.673622	-0.56999	insig
XMW3530	C10H15NO	dl-2-benzylamino-1-Propanol	Alcohol	34303.7	33564.4	39181.4	30754.7	35327.2	30427.2	0.689306	0.212804	0.253592	0.901538	-0.149541	insig
KMW0310	C10H16O	2-Cyclohexen-1-ol, 1-methyl-4-(1-methylethenyl)-, trans-	Alcohol	16100.8	15334.4	11226.7	9252.69	12420	9549.85	0.802555	0.11431	0.146533	0.731861	-0.450358	insig
NMW0209	C11H20O2	Undecylenic Acid	Acid	9	9	9	3056.6	3825.02	2779.13	1.13125	0.00935609	0.0296222	357.806	8.48303	up
KMW0461	C9H18O2	Nonanoic Acid	Acid	58887	48677	75160	11202.5	63291.7	8661.03	0.762121	0.194782	0.235564	0.455087	-1.13579	insig
WMW0087	C9H18O2	Butanoic Acid, 3-methylbutyl ester	Acid	5156.96	4613.21	4120.5	73907.8	67871	63367.1	1.12958	0.00210656	0.0232477	14.7686	3.88446	up
NMW0042	C8H16O2	Valproic Acid	Acid	10123.6	8772.44	8341.5	12708.7	10253.3	13207.4	0.916786	0.0616208	0.0847286	1.32792	0.40917	insig
KMW0035	C4H8O2	Butanoic Acid	Acid	30892.5	22454	23334.3	118323	9	86113.9	0.320668	0.351038	0.401587	2.66619	1.41478	insig
